# Supplementary material
Source: Elsevier journal article supplement (https://www.sciencedirect.com/science/article/pii/S1576988722000188)
Supplement: mmc1 [file S1576988722000188:mmc1.docx]

**Supplementary information**

Table S1: Associations between education of the participants and COVID-19 vaccine awareness.

| Variables |  | Below Bachelor degree  (n = 230) | Bachelor degree  (n = 335) | Master's degree or above  (n = 238) |  | Below Bachelor degree | | | | Bachelor degree | | | |
| --- | --- | --- | --- | --- | --- | --- | --- | --- | --- | --- | --- | --- | --- |
| COR  (95th CI) | p | AOR@  (95th CI) | p | COR  (95th CI) | p | AOR@  (95th CI) | p |
| Do you think Corona Virus lost his effectiveness? | No | 140  (60.87) | 157  (46.87) | 133  (55.88) | 17.051  (0.002) | 1.86  (0.98-3.52) | 0.058 | 1.76  (0.88-3.5) | 0.112 | 1.18  (0.68-2.06) | 0.559 | 1.19  (0.64-2.2) | 0.577 |
| Yes | 17  (7.39) | 30  (8.96) | 30  (12.61) | Reference |  |  |  |  |  |  |  |
| Don't Know | 73  (31.74) | 148  (44.18) | 75  (31.51) | 1.72  (0.87-3.38) | 0.117 | 1.58  (0.76-3.28) | 0.22 | 1.97  (1.11-3.51) | 0.021 | 1.82  (0.97-3.42) | 0.064 |
| At present time, do you regularly use protective tools (like mask, gloves, sanitizer etc.)? | No | 15  (6.52) | 11  (3.28) | 16  (6.72) | 22.968  (0.000) | 1.06  (0.5-2.26) | 0.881 | 0.95  (0.39-2.33) | 0.918 | 0.37  (0.16-0.82) | 0.014 | 0.41  (0.16-1.05) | 0.063 |
| Not regular basis | 123  (53.48) | 129  (38.51) | 118  (49.58) | 1.18  (0.81-1.72) | 0.394 | 0.82  (0.54-1.26) | 0.37 | 0.58  (0.41-0.82) | 0.002 | 0.46  (0.31-0.69) | 0.000 |
| Regularly | 92  (40.00) | 195  (58.21) | 104  (43.70) | Reference |  |  |  |  |  |  |  |
| Do you know Government of India started the Vaccination program for COVID-19? | No | 34  (14.78) | 7  (2.09) | 18  (7.56) | 33.369  (0.000) | 2.12  (1.16-3.87) | 0.015 | 1.65  (0.84-3.22) | 0.143 | 0.26  (0.11-0.63) | 0.003 | 0.21  (0.08-0.53) | 0.001 |
| Yes | 196  (85.22) | 328  (97.91) | 220  (92.44) | Reference |  |  |  |  |  |  |  |
| Do you have any idea about COVID-19 Vaccine? | No | 167  (72.61) | 170  (50.75) | 107  (44.96) | 42.261  (0.000) | 3.24  (2.21-4.77) | 0.000 | 4.35  (2.79-6.77) | 0.000 | 1.26  (0.9-1.76) | 0.172 | 1.8  (1.22-2.66) | 0.003 |
| Yes | 63  (27.39) | 165  (49.25) | 131  (55.04) | Reference |  |  |  |  |  |  |  |
| Did you already taken COVID-19 Vaccine? | No | 224  (97.39) | 320  (95.52) | 219  (92.02) | 7.334  (0.026) | 3.24  (1.27-8.26) | 0.014 | 1.13  (0.4-3.23) | 0.815 | 1.85  (0.92-3.72) | 0.084 | 0.88  (0.37-2.06) | 0.768 |
| Yes | 6  (2.61) | 15  (4.48) | 19  (7.98) | Reference |  |  |  |  |  |  |  |
| Do you think this vaccine able to deliver fruitful results? | Don't know | 81  (35.22) | 97  (28.96) | 68  (28.57) | 20.946  (0.002) | 1.54  (0.94-2.53) | 0.089 | 1.9  (1.09-3.29) | 0.023 | 1.55  (0.96-2.49) | 0.07 | 1.94  (1.15-3.3) | 0.014 |
| May be | 96  (41.74) | 176  (52.54) | 95  (39.92) | 1.3  (0.81-2.09) | 0.268 | 1.46  (0.87-2.45) | 0.153 | 2.01  (1.3-3.12) | 0.002 | 2.4  (1.48-3.89) | 0.000 |
| No | 5  (2.17) | 5  (1.49) | 13  (5.46) | 0.5  (0.17-1.49) | 0.212 | 0.88  (0.27-2.88) | 0.827 | 0.42  (0.14-1.25) | 0.118 | 0.84  (0.25-2.78) | 0.774 |
| Yes | 48  (20.87) | 75  (22.39) | 62  (26.05) | Reference |  |  |  |  |  |  |  |
| Did you recommended or suggested your family members for vaccination? | No | 25  (10.87) | 75  (22.39) | 45  (18.91) | 13.22  (0.001) | 0.52  (0.31-0.89) | 0.016 | 0.5  (0.28-0.87) | 0.015 | 1.24  (0.82-1.87) | 0.313 | 1.09  (0.68-1.74) | 0.716 |
| Yes | 205  (89.13) | 260  (77.61) | 193  (81.09) | Reference |  |  |  |  |  |  |  |
| If you want to take Vaccine for COVID-19, which vaccine of the following do you prefer? | Covaxin (Bharat Biotech, India) | 149  (64.78) | 195  (58.21) | 141  (59.24) | 13.295  (0.039) | Reference |  |  |  |  |  |  |  |
| Covishield (Oxford University; United kingdom) | 51  (22.17) | 100  (29.85) | 65  (27.31) | 0.74  (0.48-1.14) | 0.178 | 0.97  (0.6-1.57) | 0.918 | 1.13  (0.77-1.65) | 0.53 | 1.29  (0.84-1.99) | 0.245 |
| Pfizer / Sputnik V / CoronaVac | 15 (6.52) | 8 (2.39) | 13 (5.46) | 1.09  (0.5-2.38) | 0.825 | 1.07  (0.45-2.57) | 0.872 | 0.45  (0.18-1.12) | 0.086 | 0.4  (0.15-1.06) | 0.066 |
| None of them | 15  (6.52) | 35  (10.45) | 19  (7.98) | 0.75  (0.36-1.53) | 0.424 | 0.61  (0.28-1.30) | 0.199 | 1.35  (0.74-2.46) | 0.323 | 0.97  (0.5-1.88) | 0.922 |
| Do you believe COVID-19 vaccine contains unsafe toxin? | Don't know | 153  (66.52) | 187  (55.82) | 104  (43.70) | 31.768  (0.000) | 2.19  (1.46-3.3) | 0.000 | 2.4  (1.53-3.77) | 0.000 | 1.6  (1.11-2.32) | 0.012 | 1.81  (1.19-2.74) | 0.005 |
| May be | 15  (6.52) | 36  (10.75) | 32  (13.45) | 0.7  (0.35-1.4) | 0.312 | 0.67  (0.32-1.42) | 0.3 | 1.004  (0.58-1.75) | 0.99 | 0.96  (0.52-1.79) | 0.91 |
| No | 61  (26.52) | 102  (30.45) | 91  (38.24) | Reference |  |  |  |  |  |  |  |
| Yes | 1  (0.43) | 10  (2.99) | 11  (4.62) | 0.14  (0.02-1.08) | 0.059 | 0.17  (0.02-1.48) | 0.11 | 0.81  (0.33-1.99) | 0.649 | 0.85  (0.3-2.39) | 0.766 |
| Do you think Vaccination causes any type of illness or disease? | Don't know | 136  (59.13) | 138  (41.19) | 88  (36.97) | 33.435  (0.000) | 2.21  (1.29-3.79) | 0.004 | 2.41  (1.33-4.38) | 0.004 | 1.61  (0.97-2.65) | 0.065 | 1.88  (1.08-3.3) | 0.027 |
| May be | 59  (25.65) | 132  (39.4) | 94  (39.50) | 0.9  (0.51-1.59) | 0.715 | 0.84  (0.45-1.56) | 0.577 | 1.44  (0.87-2.37) | 0.155 | 1.35  (0.78-2.34) | 0.29 |
| No | 30  (13.04) | 42  (12.54) | 43  (18.07) | Reference |  |  |  |  |  |  |  |
| Yes | 5  (2.17) | 23  (6.87) | 13  (5.46) | 0.55  (0.18-1.71) | 0.302 | 0.68  (0.2-2.25) | 0.527 | 1.81  (0.81-4.04) | 0.147 | 2.1  (0.85-5.18) | 0.106 |
| Do you know someone who was vaccinated but got the disease or any type of illness? | No | 218  (94.78) | 281  (83.88) | 208  (87.39) | 17.392  (0.000) | Reference |  |  |  |  |  |  |  |
| Yes | 12  (5.22) | 54  (16.12) | 30  (12.61) | 0.38  (0.19-0.76) | 0.007 | 0.39  (0.19-0.81) | 0.011 | 1.33  (0.82-2.15) | 0.242 | 1.33  (0.77-2.3) | 0.303 |
| Do you think Corona vaccines contains a live version of the Corona virus? | Don't know | 182  (79.13) | 234  (69.85) | 135  (56.72) | 32.116  (0.000) | 2.48  (1.62-3.81) | 0.000 | 2.95  (1.82-4.76) | 0.000 | 1.69  (1.17-2.45) | 0.006 | 2.07  (1.35-3.15) | 0.001 |
| No | 44  (19.13) | 83  (24.78) | 81  (34.03) | Reference |  |  |  |  |  |  |  |
| Yes | 4  (1.74) | 18  (5.37) | 22  (9.24) | 0.33  (0.11-1.03) | 0.057 | 0.34  (0.1-1.1) | 0.073 | 0.8  (0.4-1.6) | 0.525 | 0.75  (0.35-1.61) | 0.456 |
| Do you think, you can ditch your mask, forget social distancing after you get vaccinated with Corona vaccines? | After get the Vaccine, no longer needed this | 39  (16.96) | 14  (4.18) | 14  (5.88) | 30.605  (0.000) | 3.36  (1.76-6.38) | 0.000 | 3.54  (1.72-7.29) | 0.001 | 0.72  (0.34-1.54) | 0.395 | 0.71  (0.31-1.62) | 0.415 |
| I don't want to take Corona Virus Vaccine | 15  (6.52) | 26  (7.76) | 12  (5.04) | 1.51  (0.69-3.3) | 0.307 | 1.3  (0.56-3) | 0.544 | 1.56  (0.77-3.16) | 0.219 | 1.36  (0.62-2.96) | 0.445 |
| Needed to maintain protective measures | 176  (76.52) | 295  (88.06) | 212  (89.08) | Reference |  |  |  |  |  |  |  |
| Do you think, natural immunity is better than vaccine-acquired immunity? | Don't know | 87  (37.83) | 85  (25.37) | 47  (19.75) | 25.151  (0.000) | 2.83  (1.8-4.46) | 0.000 | 3.44  (2.03-5.83) | 0.000 | 1.56  (1.01-2.41) | 0.042 | 2.29  (1.38-3.81) | 0.001 |
| May be | 42  (18.26) | 76  (22.69) | 41  (17.23) | 1.57  (0.94-2.63) | 0.087 | 1.43  (0.82-2.5) | 0.21 | 1.6  (1.02-2.51) | 0.041 | 1.48  (0.9-2.43) | 0.122 |
| No | 22  (9.57) | 34  (10.15) | 29  (12.18) | 1.16  (0.62-2.16) | 0.637 | 1.15  (0.58-2.29) | 0.678 | 1.01  (0.58-1.76) | 0.963 | 0.98  (0.53-1.81) | 0.953 |
| Yes | 79  (34.35) | 140  (41.79) | 121  (50.84) | Reference |  |  |  |  |  |  |  |
| Do you think once you receive the corona virus vaccine, you're immune for life? | Don't know | 115  (50.00) | 147  (43.88) | 67  (28.15) | 37.393  (0.000) | 4.29  (1.59-11.6) | 0.004 | 4.19  (1.43-12.3) | 0.009 | 2.53  (1.14-5.62) | 0.022 | 2.63  (1.08-6.4) | 0.033 |
| May be | 41  (17.83) | 62  (18.51) | 34  (14.29) | 3.01  (1.05-8.62) | 0.039 | 2.71  (0.87-8.45) | 0.085 | 2.1  (0.9-4.93) | 0.087 | 1.75  (0.69-4.48) | 0.241 |
| No | 68  (29.57) | 113  (33.73) | 122  (51.26) | 1.39  (0.52-3.76) | 0.512 | 1.25  (0.43-3.65) | 0.679 | 1.07  (0.49-2.34) | 0.868 | 0.96  (0.4-2.28) | 0.923 |
| Yes | 6  (2.61) | 13  (3.88) | 15  (6.30) | Reference |  |  |  |  |  |  |  |
| Do you think Vaccine only useful for older people? | Don't know | 126  (54.78) | 166  (49.55) | 91  (38.24) | 36.949  (0.000) | 0.72  (0.35-1.48) | 0.373 | 1.14  (0.51-2.54) | 0.756 | 2.96  (1.18-7.42) | 0.02 | 5.56  (2.07-14.9) | 0.001 |
| No | 79  (34.35) | 161  (48.06) | 134  (56.30) | 0.31  (0.15-0.63) | 0.001 | 0.39  (0.17-0.85) | 0.019 | 1.95  (0.79-4.85) | 0.150 | 2.74  (1.04-7.24) | 0.042 |
| Yes | 25  (10.87) | 8  (2.39) | 13  (5.46) | Reference |  |  |  |  |  |  |  |
| Do you think Vaccination may produce side effect in children? | Don't know | 191  (83.04) | 257  (76.72) | 159  (66.81) | 17.549  (0.002) | 2.32  (1.2-4.48) | 0.012 | 2.52  (1.24-5.12) | 0.011 | 1.42  (0.83-2.43) | 0.2 | 1.61  (0.88-2.94) | 0.12 |
| No | 24  (10.43) | 45  (13.43) | 50  (21.01) | 0.93  (0.42-2.05) | 0.853 | 0.79  (0.34-1.84) | 0.584 | 0.79  (0.42-1.5) | 0.473 | 0.68  (0.33-1.39) | 0.29 |
| Yes | 15  (6.52) | 33  (9.85) | 29  (12.18) | Reference |  |  |  |  |  |  |  |

@after adjusting the effect of sex, education, and occupation
